# Supplementary material
Source: publisher site journal article supplement (http://www.degruyter.com/publication/journal_key/JPLR/downloadAsset/JPLR_Book%20Review%20Guidelines.pdf)
Supplement: Supplementary file 1 [file JPLR_Book%20Review%20Guidelines.pdf]

## Journal of Politeness Research - Book Review Guidelines

### Requesting a book for review

If there is a particular book that you would like to review, please contact the Reviews Editor (information on the journal's home page) to ensure its suitability for the Journal of Politeness Research. Please include a short personal biographical statement in your email detailing your suitability as a reviewer for your chosen text (200 words max).

From time-to-time we will issue calls for reviewers for books that we have available. List of available text will be posted in the journal, online on the website of the Linguistic Politeness Research Group, and to the Linguistic Politeness Research Group mailing list. When requesting such a text, please contact the Book Reviews Editor directly (details on the journal's home page) and provide a short biographical statement detailing your suitability as a reviewer for your chosen text (200 words max).

**Having accepted an invitation to review from the journal, you are not permitted to submit your review of a set text for consideration elsewhere.** If the journal decides not to publish your submission, you will then be allowed to seek out an alternative site for publication.

### Book review guidelines

Reviews should be around 1500 words in length and must not exceed 2000 words (inclusive of references) and should contain the following:

1. Title and reference of the text under review and name of reviewer in the following format:

AUTHOR(S)/EDITOR(S). DATE. TITLE. PLACE: PUBLISHER, PAGE NUMBERS, ISBN NUMBER HARDBACK. PRICE: ISBN NUMBER PAPERBACK (if available). PRICE:.

e.g.:

### **Book review**

**Bargiela-Chiappini, Francesca and Dániel Z. Kádár (eds.). 2011. *Politeness across cultures*. Basingstoke and New York: Palgrave Macmillan, 274 pp., Hard-back ISBN 978-0-230-23648-6. Price: Hb GBP £ 62 / € 73.**

2. Synopsis of the text under review, including a brief rationale for the book in relation to the wider field, its main aims, and an overview of its structure
3. Critical engagement with the arguments set out in the text by ways of summarising individual chapters, sections, or main arguments in a one-by-one paragraph structure
4. Details of the text's contribution to its field
5. Recommendations of suitability for particular audiences (students, postgraduates, tutors, researchers, etc.)
6. Conclusion with includes an overall evaluation of the book

Reviews should be written in English. Book reviews do not require an abstract. Reviewers have **THREE MONTHS** from the date of receipt of the text to prepare and submit their review.

### **Submission of reviews**

The journal only accepts reviews which have not been published elsewhere and we only accept electronic submission. The journal only accepts reviews which have not been published elsewhere. It is the reviewer's responsibility to i) comply with the journal's ethical guidelines ([http://www.degruyter.com/staticfiles/pdfs/140117\\_Publication\\_ethics\\_and\\_publication\\_malpractice\\_FINAL.pdf](http://www.degruyter.com/staticfiles/pdfs/140117_Publication_ethics_and_publication_malpractice_FINAL.pdf)), ii) ensure that your review does not contain copyrighted material (or ensure that you gain approval from the responsible parties to use such material), and iii) ensure that your review does not contain libellous or potentially libellous material.

When preparing your manuscript for submission please format your document in a way that is consistent with the journal's stylesheet:

[http://www.degruyter.com/staticfiles/pdfs/mouton\\_journal\\_stylesheet.pdf](http://www.degruyter.com/staticfiles/pdfs/mouton_journal_stylesheet.pdf).

Completed reviews should be submitted online to: <http://mc.manuscriptcentral.com/jplr>.

### **Outcome of submission**

Upon receipt of your submission, it will be reviewed by the Reviews Editor and you may be asked to make some minor changes. Deadlines for such changes will be **ONE MONTH**. Having the final version submitted of your review accepted, your review will then be sent for copyediting. You will receive a proof of your work to approve before publication. Reviewers are given **ONE WEEK** to address any concerns with proofs. After one week the journal may publish the work as given in the proofs.

### **More Information**

See our website for more information: <http://www.degruyter.com/view/j/jplr>

Any questions may be directed to: [i.v.bom@shu.ac.uk](mailto:i.v.bom@shu.ac.uk) or [politeness.research@degruyter.com](mailto:politeness.research@degruyter.com)
